# Supplementary material for: A mutation in Ampd2 is associated with nephrotic syndrome and hypercholesterolemia in mice
Source: PubMed Central journal article supplement (PMC4232700; doi:10.1186/1476-511x-13-167), 2014-10-31

Supplemental Figure 1.

A.

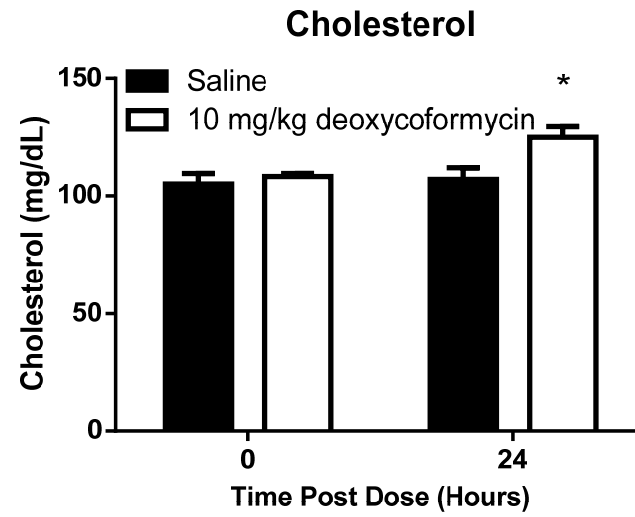

B.

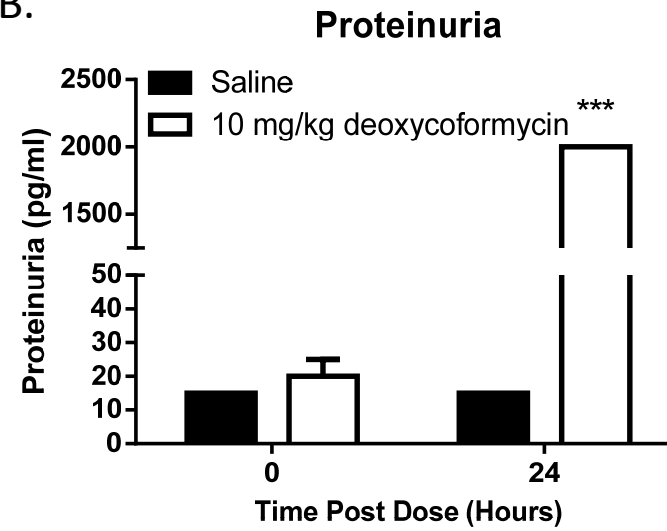

Supplement: 12944_2014_1148_MOESM2_ESM.pdf [file 12944_2014_1148_MOESM2_ESM.pdf]
